# Supplementary material for: Programmable DNA barcode-encoded exponential amplification reaction for the multiplex detection of miRNAs
Source: Royal Society of Chemistry journal article supplement (doi:10.1039/d3ay02215c), 2024-01-01
Supplement: d3ay02215c1.pdf [file d3ay02215c1.pdf]

## Electronic Supporting Material

### **Programmable DNA barcode-encoded exponential amplification reaction for the multiplex detection of miRNAs**

Yuqian Tan<sup>a,1</sup>, Li Zhang<sup>a,1</sup>, Shixiong Deng<sup>a,\*</sup>

<sup>a</sup> Department of forensic medicine, Chongqing Medical University,  
Chongqing 400016, China.

<sup>1</sup> These authors contributed equally to this work

\* Corresponding author

Email address: [dengshixiong@cqmu.edu.cn](mailto:dengshixiong@cqmu.edu.cn) (Shixiong Deng)

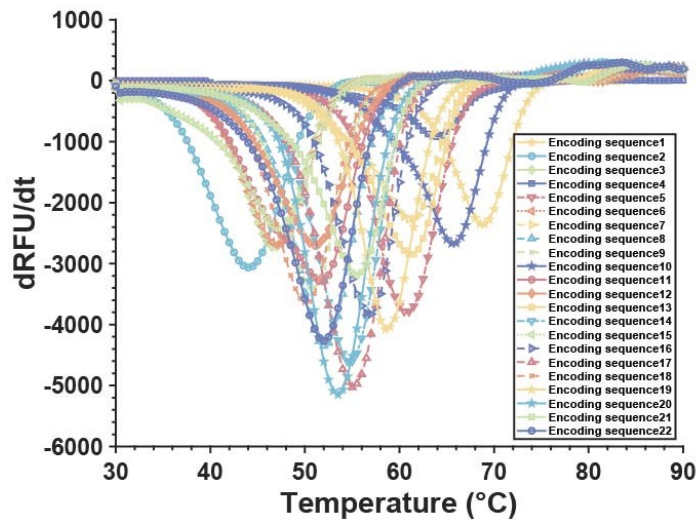

**Figure S1** The melting curve of the one or two mutations to the original encoding sequence.

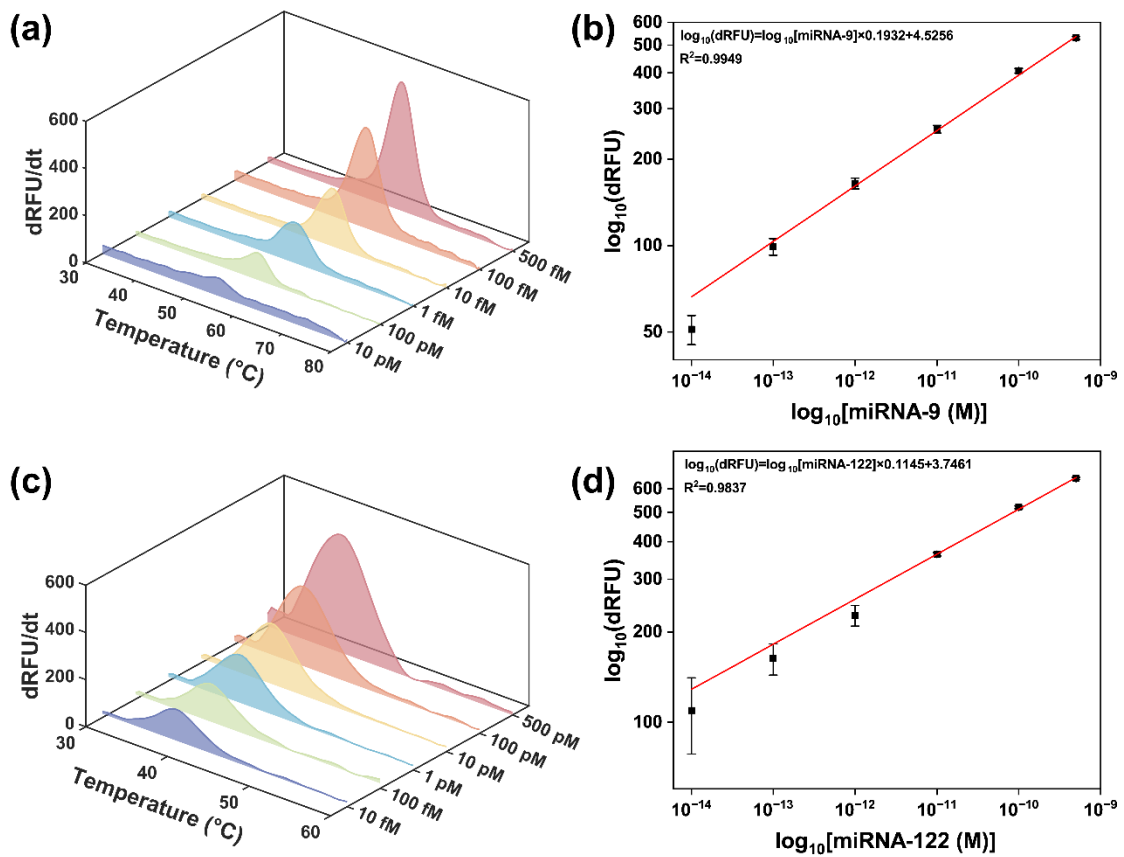

**Figure S2** Sensitivity and specificity of the E-EXPAR. (a) and (c), Melting curve of miRNA detection system at various concentrations of miRNA-9 or miRNA-122 from 10 fM to 500 pM. (b) and (d) The linear relationship between the logarithmic rate of fluorescence change and the concentration of miRNA-9 or miRNA-122.

**Table S1** Sequences of the designed oligonucleotides

| <b>Oligonucleotides</b> | <b>Sequence (from 5' to 3')</b>                                                           |
|-------------------------|-------------------------------------------------------------------------------------------|
| Q1                      | GTGGAGTAGTTGGATGAAGTAGGG                                                                  |
| Q2                      | GTGGAGTAGTTGGATGTAGTAGGG                                                                  |
| Q3                      | GTGGAGTAGTTAGATGAAGTAGGG                                                                  |
| Q4                      | GTAGAGTAGTTGGATGAAGTAGGG                                                                  |
| Q5                      | GTGGAGTAGACGGATGAAGTAGGG                                                                  |
| Q6                      | GTGAAGTAGTTGGATAAAGTAGGG                                                                  |
| Q7                      | GTGGAGTCCTTGGATGAAGTAGGG                                                                  |
| Q8                      | GTGAAGTAGTTGGATCAAGTAGGG                                                                  |
| Q9                      | GTGAAGTACTTGGATAAAGTAGGG                                                                  |
| Q10                     | GTGGAAATGTTGGATGAAGTAGGG                                                                  |
| Q11                     | GTGAAGTAGTTGGATCCAGTAGGG                                                                  |
| Q12                     | GTGAAGTAGGTGGATCAAGTAGGG                                                                  |
| Q13                     | GTGATGTAGTTGGATCAAGTAGGG                                                                  |
| Q14                     | GTGAGGTAGTTGGATCAAGTAGGG                                                                  |
| Q15                     | GTGAAGGAGTTGCATGAAGTAGGG                                                                  |
| Q16                     | GTGAAGTAGTTGCTTGAAGTAGGG                                                                  |
| Q17                     | GTGAAGTAGTTCGATAAAGTAGGG                                                                  |
| Q18                     | GTGAAGTAATTGGATAAAGTAGGG                                                                  |
| Q19                     | GTGAAGTAGATGGATAAAGTAGGG                                                                  |
| Q20                     | GTGAACTAGTTGGATAAAGTAGGG                                                                  |
| Q21                     | GTGAAGTAGTTGAATAAAGTAGGG                                                                  |
| Q22                     | GTCGAGTAGTTGAATAAAGTAGGG                                                                  |
| Probe                   | HEX-CCCTACTTCATCCAACACTCCAC-p'                                                            |
| MI-21                   | UAGCUUAUCAGACUGAUGUUGA                                                                    |
| template21              | CCCTACTTCATCTGGAGACTCAACATCAGTCTGATAAGCTAGGAGACTCAACAT<br>CAGTCTGATAAGCTA-p'              |
| mi-9                    | UCUUUGGUUAUCUAGCUGUAUGA                                                                   |
| template9               | CCCTACTTCATCCAAGGACTCCACTCATACAGCTAGATAACCAAAGAGGAGACT<br>CATACAGCTAGATAACCAAAGA-p'       |
| mi122                   | UGGAGUGUGACAAUGGUGUUUG                                                                    |
| Template122             | CCCTACTTTATCCAAGTACTTCACGGAGACCAAACACCATTGTCACACTCCATT<br>GGAGACCAAACACCATTGTCACACTCCA-p' |
| mi9:forward<br>primer   | CGCGTCTTTGGTTATCTAGCTGTATGA                                                               |
| mi21:forward<br>primer  | CGCGCTAGCTTATCAGACTGATGTTGA                                                               |
| mi122:forward<br>primer | CGTGGAGTGTGACAATGGTGTGTTG                                                                 |
| MI141                   | UAACACUGUCUGGUAAAGAUGG                                                                    |
| MI155                   | UUAAUGCUGAUCGUGAUAGGGGU                                                                   |
| MI199a                  | ACAGUAGUCUGCACAUUGGUUA                                                                    |

|    |                        |
|----|------------------------|
| M1 | AAGCTTATCAGACTGATGTTGA |
| M2 | CCGCTTATCAGACTGATGTTGA |

**Table S2** Comparison of the reported fluorescence platforms for miRNAs detection

| Amplification method                                                               | Detection limit | Multiple detect | Time       | Reference |
|------------------------------------------------------------------------------------|-----------------|-----------------|------------|-----------|
| Exponential amplification reaction-triggered three dimensional bipedal DNA walkers | 10 fM           | /               | 70 min     | [1]       |
| Cas12a-mediated cascade amplification                                              | 1 aM            | /               | 110 min    | [2]       |
| nicking-assisted exponential amplification                                         | 100 aM          | /               | 60 min     | [3]       |
| DNAzyme-assisted Rolling circle amplification                                      | 10 fM           | /               | 5 h        | [4]       |
| Rolling Circular Amplification (RCA)- Assisted CRISPR/Cas9 Cleavage (RACE)         | 90 fM           | Yes             | 2 h 35 min | [5]       |
| Catalytic hairpin assembly gel assay                                               | 10 fM           | Yes             | 3 h        | [6]       |
| alkaline phosphatase-assisted isothermal reaction                                  | 180 aM          | Yes             | 8 h        | [7]       |
| E-EXPAR                                                                            | 1.3 fM          | Yes             | 70 min     | This work |

## References

- [1] L. Yang, J. Fang, J. Li, X. Ou, L. Zhang, Y. Wang, Z. Weng, G. Xie, An integrated fluorescence biosensor for microRNA detection based on exponential amplification reaction-triggered three-dimensional bipedal DNA walkers, *Anal. Chim. Acta.* 1143 (2021) 157–165.
- [2] J. Jiang, B. Zhang, C. Zhang, Y. Guan, A Novel Design Combining Isothermal Exponential Amplification and Gold-Nanoparticles Visualization for Rapid Detection of miRNAs, *Int. J. Mol. Sci.* 19 (2018) 3374.
- [3] C. Yuan, J. Fang, X. Luo, Y. Zhang, G. Huang, X. Zeng, K. Xia, M. Li, X. Chen, X. Yang, M.L. de la Chapelle, W. Fu, One-step isothermal amplification strategy for microRNA specific and ultrasensitive detection based on nicking-assisted entropy-driven DNA circuit triggered exponential amplification reaction, *Anal. Chim. Acta.* 1203 (2022) 339706.

- [4] X. Liu, M. Zou, D. Li, R. Yuan, Y. Xiang, Hairpin/DNA ring ternary probes for highly sensitive detection and selective discrimination of microRNA among family members, *Anal. Chim. Acta.* 1076 (2019) 138–143.
- [5] R. Wang, X. Zhao, X. Chen, X. Qiu, G. Qing, H. Zhang, L. Zhang, X. Hu, Z. He, D. Zhong, Y. Wang, Y. Luo, Rolling Circular Amplification (RCA)-Assisted CRISPR/Cas9 Cleavage (RACE) for Highly Specific Detection of Multiple Extracellular Vesicle MicroRNAs, *Anal. Chem.* 92 (2020) 2176–2185.
- [6] W. Dai, J. Zhang, X. Meng, J. He, K. Zhang, Y. Cao, D. Wang, H. Dong, X. Zhang, Catalytic hairpin assembly gel assay for multiple and sensitive microRNA detection, *Theranostics.* 8 (2018) 2646–2656.
- [7] M. Wang, H. Yin, Y. Zhou, J. Han, T. He, L. Cui, S. Ai, Photoelectrochemical biosensor for microRNA detection based on multiple amplification strategies, *Mikrochim. Acta.* 185 (2018) 257.
